# Supplementary material for: Is haemoglobin below 7.0 g/dL an optimal trigger for allogenic red blood cell transfusion in patients admitted to intensive care units? A meta-analysis and systematic review
Source: PubMed Central journal article supplement — BMJ Open. 2020 Feb 5;10(2):e030854. doi: 10.1136/bmjopen-2019-030854 (PMC7045194; doi:10.1136/bmjopen-2019-030854), 2020-02-05
Supplement: bmjopen-2019-030854supp001.pdf [file bmjopen-2019-030854supp001.pdf]

**Search strategy**

(((((((((critical care) OR intensive care) OR ICU) OR SICU) OR critical care[MeSH Terms]) OR intensive care unit[MeSH Terms])) AND (((((red blood cell\*[Title/Abstract]) OR blood transfusion[MeSH Terms])) AND (((therap\*[Title/Abstract]) OR transfus\*[Title/Abstract]) OR restrict\*[Title/Abstract]) OR liberal\*[Title/Abstract] OR trigger\*[Title/Abstract] OR threshold\*[Title/Abstract] OR conservative\*[Title/Abstract] OR aggress\*[Title/Abstract]))) OR blood transfusion\*[Title/Abstract])) AND (((((((((((random\*[Title/Abstract]) OR "randomized controlled trial"[Publication Type]) OR systematic\*[Title/Abstract]) OR metaanalys\*[Title/Abstract]) OR meta analys\*[Title/Abstract]) OR guideline\*[Title/Abstract]) OR "guideline"[Publication Type]) OR consensus[Title/Abstract]) OR "appropriateness criteria"[Title/Abstract]) OR "choosing wisely"[Title/Abstract]) OR "appropriate use criteria"[Title/Abstract]) OR ((GRADE[Title/Abstract]) AND recommendation\*[Title/Abstract]))
