# Supplementary material for: Is haemoglobin below 7.0 g/dL an optimal trigger for allogenic red blood cell transfusion in patients admitted to intensive care units? A meta-analysis and systematic review
Source: PubMed Central journal article supplement — BMJ Open. 2020 Feb 5;10(2):e030854. doi: 10.1136/bmjopen-2019-030854 (PMC7045194; doi:10.1136/bmjopen-2019-030854), 2020-02-05
Supplement: bmjopen-2019-030854supp002.pdf [file bmjopen-2019-030854supp002.pdf]

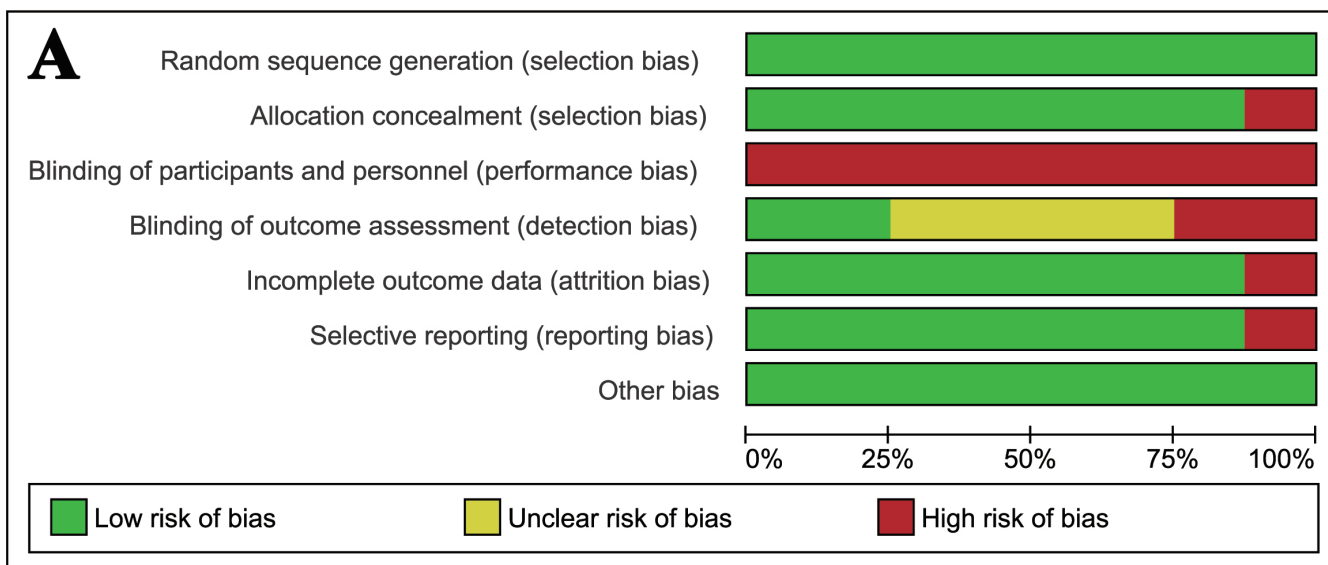

**B**

|                 | Random sequence generation (selection bias) | Allocation concealment (selection bias) | Blinding of participants and personnel (performance bias) | Blinding of outcome assessment (detection bias) | Incomplete outcome data (attrition bias) | Selective reporting (reporting bias) | Other bias |
|-----------------|---------------------------------------------|-----------------------------------------|-----------------------------------------------------------|-------------------------------------------------|------------------------------------------|--------------------------------------|------------|
| Bergamin 2017   | +                                           | +                                       | -                                                         | -                                               | +                                        | +                                    | +          |
| Gobatto 2019    | +                                           | +                                       | -                                                         | ?                                               | +                                        | +                                    | +          |
| Hebert 1999     | +                                           | +                                       | -                                                         | ?                                               | +                                        | +                                    | +          |
| Holst 2014      | +                                           | +                                       | -                                                         | +                                               | +                                        | +                                    | +          |
| Mazza 2015      | +                                           | -                                       | -                                                         | ?                                               | -                                        | -                                    | +          |
| Robertson 2014  | +                                           | +                                       | -                                                         | +                                               | +                                        | +                                    | +          |
| Villanueva 2013 | +                                           | +                                       | -                                                         | -                                               | +                                        | +                                    | +          |
| Walsh 2013      | +                                           | +                                       | -                                                         | ?                                               | +                                        | +                                    | +          |
