# Supplementary material for: Is haemoglobin below 7.0 g/dL an optimal trigger for allogenic red blood cell transfusion in patients admitted to intensive care units? A meta-analysis and systematic review
Source: PubMed Central journal article supplement — BMJ Open. 2020 Feb 5;10(2):e030854. doi: 10.1136/bmjopen-2019-030854 (PMC7045194; doi:10.1136/bmjopen-2019-030854), 2020-02-05
Supplement: bmjopen-2019-030854supp003.pdf [file bmjopen-2019-030854supp003.pdf]

Supplementary Table 1 Summary of Findings

| Outcomes                | Illustrative comparative risks* (95% CI)                                                                                                |                              | Relative effect<br>(95% CI)  | No of Participants<br>(studies) | Quality of the evidence<br>(GRADE) | Comments |
|-------------------------|-----------------------------------------------------------------------------------------------------------------------------------------|------------------------------|------------------------------|---------------------------------|------------------------------------|----------|
|                         | Assumed risk                                                                                                                            | Corresponding risk           |                              |                                 |                                    |          |
|                         | Control                                                                                                                                 | Critical illness             |                              |                                 |                                    |          |
| Short-term mortality    | Study population                                                                                                                        |                              | OR 0.9<br>(0.67 to 1.21)     | 3415<br>(8 studies)             | ⊕⊕⊕⊖<br>moderate <sup>1</sup>      |          |
|                         | 246 per 1000                                                                                                                            | 227 per 1000<br>(180 to 283) |                              |                                 |                                    |          |
|                         | Moderate                                                                                                                                |                              |                              |                                 |                                    |          |
|                         | 280 per 1000                                                                                                                            | 259 per 1000<br>(207 to 320) |                              |                                 |                                    |          |
| Hospital length of stay | The mean hospital length of stay in the intervention groups was<br><b>0.11 standard deviations lower</b><br>(0.30 lower to 0.07 higher) |                              | SMD -0.11<br>(-0.30 to 0.07) | 2171<br>(5 studies)             | ⊕⊕⊕⊖<br>low <sup>1</sup>           |          |
| ICU length of stay      | The mean icu length of stay in the intervention groups was<br><b>0.03 standard deviations lower</b><br>(0.14 lower to 0.08 higher)      |                              | SMD -0.03<br>(-0.14 to 0.08) | 1282<br>(4 studies)             | ⊕⊕⊕⊖<br>low <sup>1</sup>           |          |
| Myocardial Infraction   | Study population                                                                                                                        |                              | OR 0.54<br>(0.3 to 0.98)     | 2127<br>(4 studies)             | ⊕⊕⊕⊖<br>moderate <sup>1</sup>      |          |
|                         | 29 per 1000                                                                                                                             | 16 per 1000<br>(9 to 29)     |                              |                                 |                                    |          |
|                         | Moderate                                                                                                                                |                              |                              |                                 |                                    |          |
|                         | 29 per 1000                                                                                                                             | 16 per 1000<br>(9 to 28)     |                              |                                 |                                    |          |
| Ischemic event          | Study population                                                                                                                        |                              |                              |                                 |                                    |          |

|  |                    |                    |                |             |                              |
|--|--------------------|--------------------|----------------|-------------|------------------------------|
|  | <b>61 per 1000</b> | <b>49 per 1000</b> |                |             |                              |
|  |                    | (27 to 87)         |                |             |                              |
|  | <b>Moderate</b>    |                    | <b>OR 0.8</b>  | 2466        | ⊕⊕⊕⊖                         |
|  |                    |                    | (0.43 to 1.48) | (5 studies) | <b>moderate</b> <sup>1</sup> |
|  | <b>61 per 1000</b> | <b>49 per 1000</b> |                |             |                              |
|  |                    | (27 to 88)         |                |             |                              |

\*The basis for the **assumed risk** (e.g. the median control group risk across studies) is provided in footnotes. The **corresponding risk** (and its 95% confidence interval) is based on the assumed risk in the comparison group and the **relative effect** of the intervention (and its 95% CI).

**CI:** Confidence interval; **OR:** Odds ratio;

GRADE Working Group grades of evidence

**High quality:** Further research is very unlikely to change our confidence in the estimate of effect.

**Moderate quality:** Further research is likely to have an important impact on our confidence in the estimate of effect and may change the estimate.

**Low quality:** Further research is very likely to have an important impact on our confidence in the estimate of effect and is likely to change the estimate.

**Very low quality:** We are very uncertain about the estimate.

<sup>1</sup> No explanation was provided
